7. Memtsoudis S, Liu SS, Ma Y, Chiu YL, Walz JM, Gaber-Baylis LK, Mazumdar M: Perioperative pulmonary outcomes in patients with sleep apnea after noncardiac surgery. *Anesth Analg* 2011; 112:113–21
8. Spurr KF, Graven MA, Gilbert RW: Prevalence of unspecified sleep apnea and the use of continuous positive airway pressure in hospitalized patients, 2004 National Hospital Discharge Survey. *Sleep Breath* 2008; 12: 229–34
9. Mokhlesi B, Hovda MD, Vekhter B, Arora VM, Chung F, Meltzer DO: Sleep-disordered breathing and postoperative outcomes after elective surgery: Analysis of the nationwide inpatient sample. *Chest* 2013; 144:903–14
10. Rothman KJ, Greenland S, Lash TL: Validity in epidemiologic studies, *Modern Epidemiology*, 3rd edition. Edited by Rothman KJ, Greenland S, Lash TL. Philadelphia, Lippincott, Williams & Wilkins, 2008, pp 128–47
11. Memtsoudis SG: In reply. *ANESTHESIOLOGY* 2014; 120:246–7
12. Lindenaier PK, Lagu T, Shieh MS, Pekow PS, Rothberg MB: Association of diagnostic coding with trends in hospitalizations and mortality of patients with pneumonia, 2003–2009. *JAMA* 2012; 307:1405–13
13. Rhee C, Murphy MV, Li L, Platt R, Klompas M; Centers for Disease Control and Prevention Epicenters Program: Comparison of trends in sepsis incidence and coding using administrative claims *versus* objective clinical data. *Clin Infect Dis* 2015; 60:88–95

## ANESTHESIOLOGY REFLECTIONS FROM THE WOOD LIBRARY-MUSEUM

### Moonflowers: Heart-racing Deliriants behind Hanaoka's *Mafutsusan* (Year 1804, Part 1)

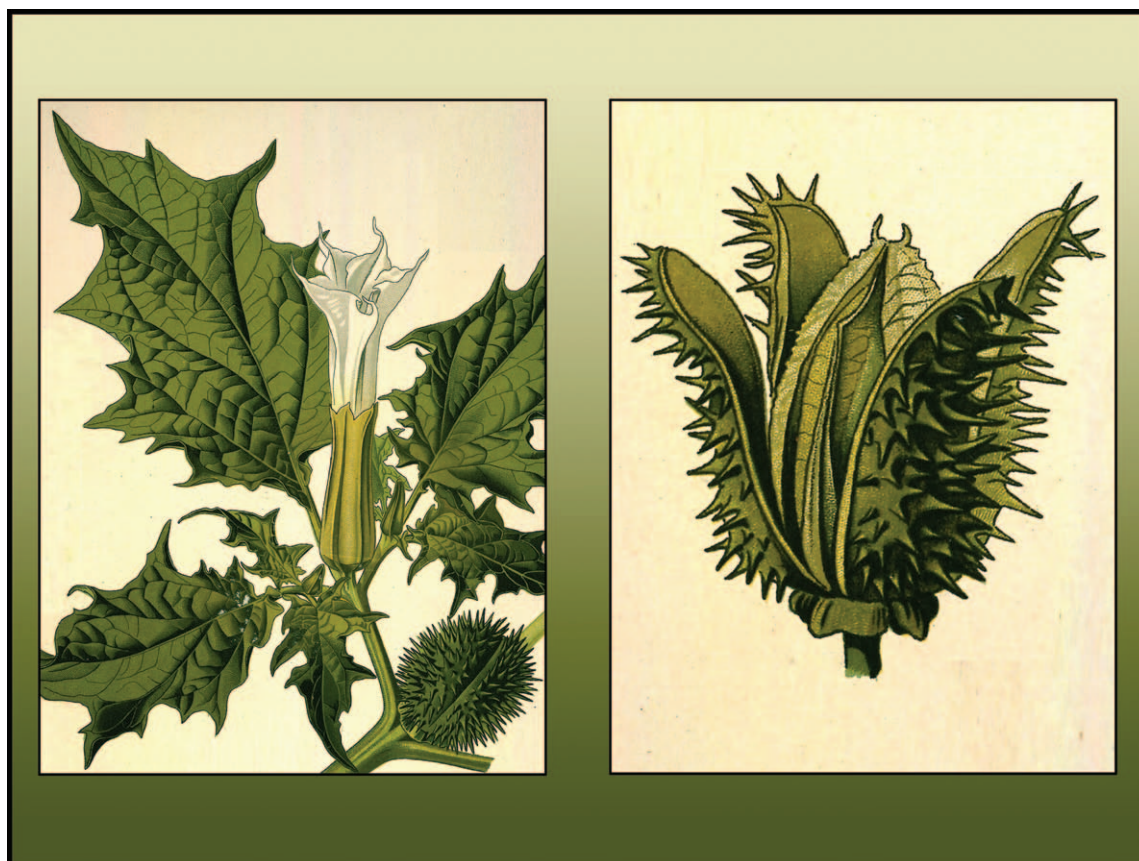

For much of the past two millennia, as successive masters of herbal medicine trekked eastward from India to China, Korea, and Japan, they hand-carried or harvested plants of the *Datura* genus, the name of which was derived from *dhatur* (Sanskrit: “white thornapple”). With pale flowers (*left*) opening at twilight, these mysterious “moonflowers,” or “Indian thornapples,” bore spiny fruit (*right*) filled with high concentrations of tropane alkaloids, such as scopolamine, atropine, and hyoscyamine. Ingesting trace amounts could produce rapid heart rates and anticholinergic delirium. Such disruptions in awareness and memory were initially exploited for religious experiences by some, and for medical use by a few of anesthesia's pioneers, including China's Hua Tuo (c. 140–c. 208) and Japan's Seishū Hanaoka (1760–1835). The anticholinergic slurry of such “moonflowers” provided the “brain dulling” portion of a primitive balanced anesthetic. (Copyright © the American Society of Anesthesiologists, Inc.)

George S. Bause, M.D., M.P.H., Honorary Curator, ASA's Wood Library-Museum of Anesthesiology, Schaumburg, Illinois, and Clinical Associate Professor, Case Western Reserve University, Cleveland, Ohio. UJYC@aol.com.
